# Supplementary material for: Potential Biomarkers and Endometrial Immune Microenvironment in Recurrent Implantation Failure
Source: Biomolecules. 2023 Feb 21;13(3):406. doi: 10.3390/biom13030406 (PMC10046278; doi:10.3390/biom13030406)
Supplement: Supplementary file 1 [file biomolecules-13-00406-s001.zip]

Archive with 5 entries (5 files):
- Supplementary Figure S2.pdf
- Supplementary Figure S3.pdf
- Supplementary Figure S4.pdf
- Supplementary Table S1-S3; Figure S1,S5-S6.pdf
- Supplementary Table S4-S7.xlsx
