# Supplementary material for: Potential Biomarkers and Endometrial Immune Microenvironment in Recurrent Implantation Failure
Source: Biomolecules. 2023 Feb 21;13(3):406. doi: 10.3390/biom13030406 (PMC10046278; doi:10.3390/biom13030406)
Supplement: Supplementary file 1 [file biomolecules-13-00406-s001.zip › Supplementary Table S1-S3; Figure S1,S5-S6.pdf]

## **Supplementary tables**

**Table S1.** Baseline characteristics and inclusion and exclusion criteria for RIF patients and fertile controls in the GSE111974 dataset.

**Table S2.** Baseline characteristics and inclusion and exclusion criteria for RIF patients and fertile controls in the GSE92324 dataset.

**Table S3.** Gene Primers for RT-qPCR.

**Table S1.** Baseline characteristics and inclusion and exclusion criteria for RIF patients and fertile controls in the GSE111974 dataset [1].

|                          | <b>Control<br/>(n = 24)</b>                                                                                                              | <b>RIF<br/>(n =24)</b>                                                                                     | <b><i>p</i><br/>value</b> |
|--------------------------|------------------------------------------------------------------------------------------------------------------------------------------|------------------------------------------------------------------------------------------------------------|---------------------------|
| Age (years)              | 31.13 ± 3.86                                                                                                                             | 32.76 ± 2.33                                                                                               | NS                        |
| BMI (kg/m <sup>2</sup> ) | 23.15 ± 1.65                                                                                                                             | 25.36 ± 1.43                                                                                               | NS                        |
| LH + day                 | 7–10                                                                                                                                     | 7–10                                                                                                       | -                         |
| Day 3 FSH (mIU/mL)       | 7.55 ± 1.67                                                                                                                              | 6.52 ± 3.18                                                                                                | NS                        |
| Day 3 E2 (mIU/mL)        | 61.86 ± 25.56                                                                                                                            | 56.41 ± 65.10                                                                                              | NS                        |
| Day 3 prolactin (ng/mL)  | 14.69 ± 5.66                                                                                                                             | 12.45 ± 4.17                                                                                               | NS                        |
| Day 3 TSH (μIU/mL)       | 2.16 ± 1.42                                                                                                                              | 2.28 ± 1.04                                                                                                | NS                        |
| Inclusion criteria       | having a history of ≥1 live birth                                                                                                        | failure of pregnancy in ≥3 consecutive IVF cycles with ≥1 transfer(s) of good quality embryo in each cycle | -                         |
| Exclusion criteria       | active pelvic infections, undiagnosed vaginal bleeding, uterine anomalies, endometriosis, karyotype anomalies, and under any medications |                                                                                                            |                           |

BMI, body mass index; LH, luteinizing hormone; FSH, follicle-stimulating hormone; E2, estradiol; TSH, thyroid stimulating hormone; RIF, recurrent implantation failure; NS, nonsignificant.

**Table S2.** Baseline characteristics and inclusion and exclusion criteria for RIF patients and fertile controls in the GSE92324 dataset [2].

|                                        | <b>Control<br/>(n = 8)</b>                                                                                       | <b>RIF<br/>(n =10)</b>                                                                                            |
|----------------------------------------|------------------------------------------------------------------------------------------------------------------|-------------------------------------------------------------------------------------------------------------------|
| Age (years)                            | 20–40                                                                                                            | 20–40                                                                                                             |
| HCG + day                              | 6–7                                                                                                              | 6–7                                                                                                               |
| LH, FSH, E2, P4, AMH,<br>and prolactin | normal                                                                                                           | normal                                                                                                            |
| Normal endometrial<br>thickness        | 8 mm                                                                                                             | 8 mm                                                                                                              |
| Inclusion criteria                     | having a history of full-term<br>normal delivery                                                                 | failure of pregnancy in $\geq 2$<br>consecutive IVF cycles with $\geq 4$<br>transfer(s) of good quality<br>embryo |
| Exclusion criteria                     | polycystic ovarian disease, endometriosis, hormonal<br>abnormalities, autoimmune disorders, and male infertility |                                                                                                                   |

HCG, human chorionic gonadotropin; LH, luteinizing hormone; FSH, follicle-stimulating hormone; E2, estradiol; P4, Progesterone; AMH, anti-Mullerian hormone; RIF, recurrent implantation failure.

**Table S3.** Gene Primers for RT-qPCR.

| Gene                    | Sequence (5' -> 3')                                                |
|-------------------------|--------------------------------------------------------------------|
| <i>NRCAM</i> (Human)    | Forwards: CTTCCAAGGCAGCAAGACTC<br>Reverse: CTTCAAAGACGAGGGAGCAC    |
| <i>ATP13A4</i> (Human)  | Forwards: GCTGCTCTACTGGGAGACAAA<br>Reverse: CACCAGCTTAGGGTAGGCAC   |
| <i>TRIB2</i> (Human)    | Forwards: ATGAACATACACAGGTCTACCCC<br>Reverse: GGGCTGAAACTCTGGCTGG  |
| <i>SHROOM3</i> (Human)  | Forwards: CCCTCTCGGGGCGTCTAGCC<br>Reverse: GCCCAGCACTACTCGCTCCC    |
| <i>FAM155B</i> (Human)  | Forwards: CACGAAAGGCTGTAAGGCTG<br>Reverse: TCGGGGAGTATAAAGGGGCA    |
| <i>ZNF436</i> (Human)   | Forwards: TAAGCCCAGTAGTGTCAGTTT<br>Reverse: CATTATAGTACCCACCCAGAG  |
| <i>SLC25A29</i> (Human) | Forwards: GGGGAGGACGAGGAGGAAA<br>Reverse: GCCTGCCACACCCCC          |
| <i>PDZD8</i> (Human)    | Forwards: AAGACCCGCTGATCGACTTC<br>Reverse: CTTGCAAGGTCTGGTATGGAAA  |
| <i>RAB32</i> (Human)    | Forwards: TGGGACAGCAGGACTCTGG<br>Reverse: ACTCGGGTCATGTTGCCAA      |
| <i>HOXB3</i> (Human)    | Forwards: ATGCAGGGCAGTCCGGTGTA<br>Reverse: GGTGATGGGAAAGGTGGTTG    |
| <i>ACTB</i> (Human)     | Forwards: GTGGCCGAGGACTTTGATTG<br>Reverse: CCTGTAACAACGAATCTCATATT |

## References

1. Bastu, E.; Demiral, I.; Gunel, T.; Ulgen, E.; Gumusoglu, E.; Hosseini, M.K.; Sezerman, U.; Buyru, F.; Yeh, J. Potential Marker Pathways in the Endometrium That May Cause Recurrent Implantation Failure. *Reprod Sci* **2019**, *26*, 879-890, doi:10.1177/1933719118792104.
2. Pathare, A.D.S.; Zaveri, K.; Hinduja, I. Downregulation of genes related to immune and inflammatory response in IVF implantation failure cases under controlled ovarian stimulation. *American Journal of Reproductive Immunology (New York, N.Y. : 1989)* **2017**, *78*, doi:10.1111/aji.12679.

## **Supplementary figures**

Figure S1. Construction of co-expression network.

Figure S5. The intersection of the 85 DEGs and 238 ERA genes.

Figure S6. Heatmap of the correlations between immune cells in the GSE111974 dataset.

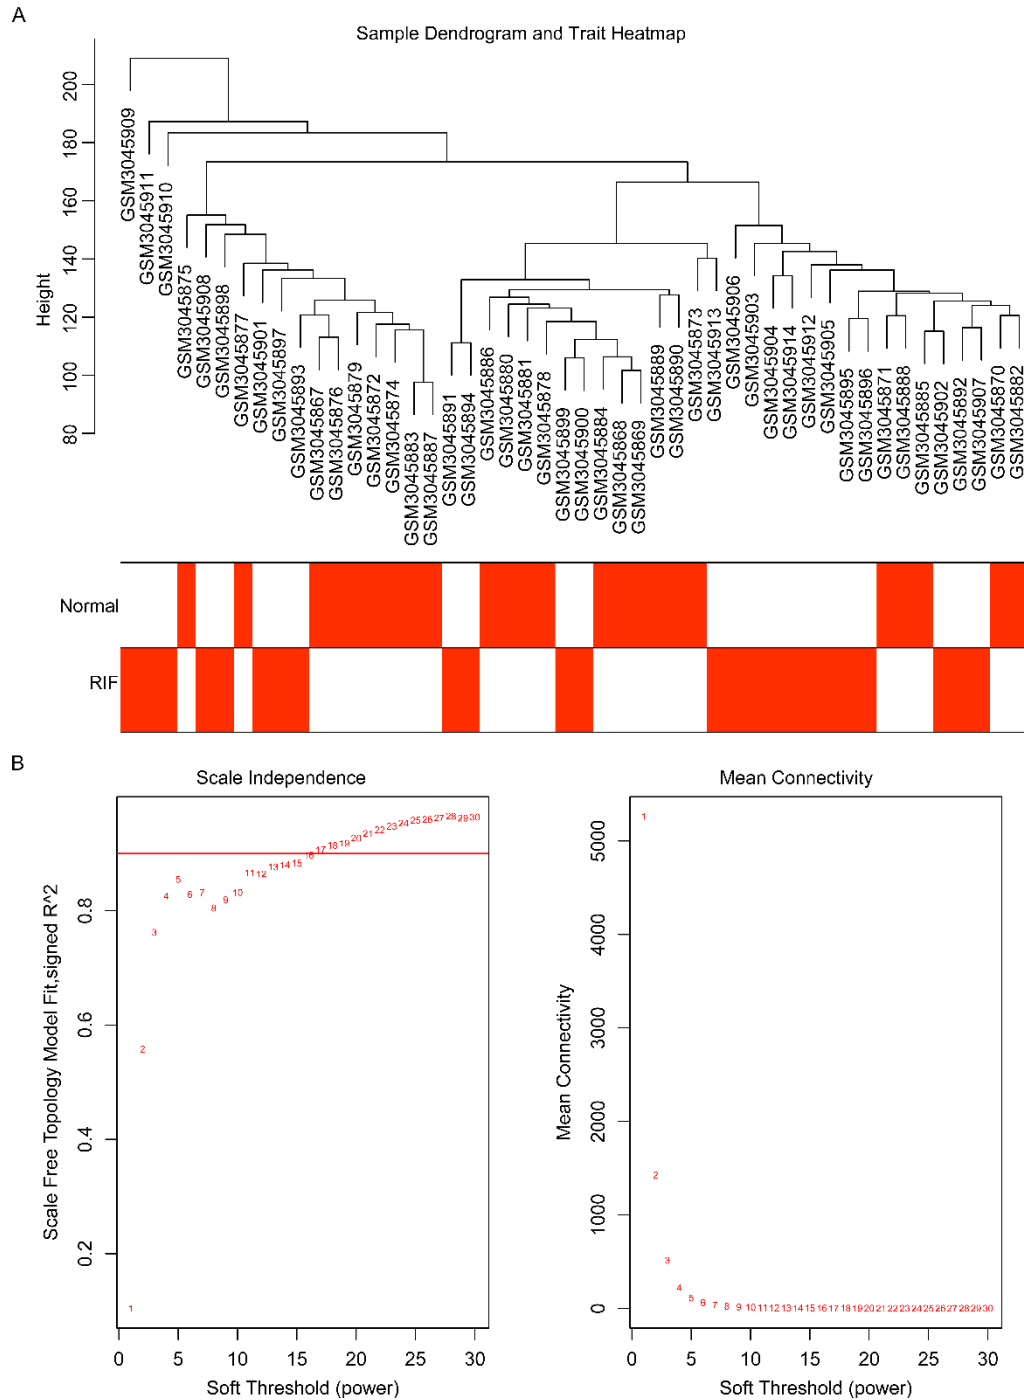

Figure S1. Construction of co-expression network. (A) Sample dendrogram and trait heatmap. (B) Analysis of the scale free topology model fit and the mean connectivity of different soft threshold powers.

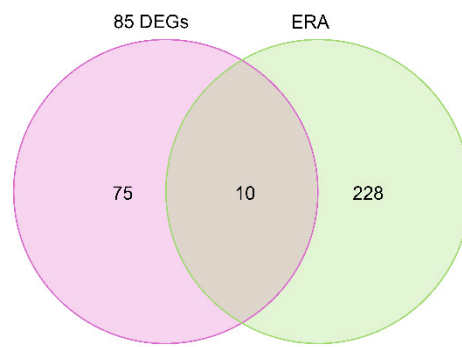

Figure S5. The intersection of the 85 DEGs and 238 ERA genes.

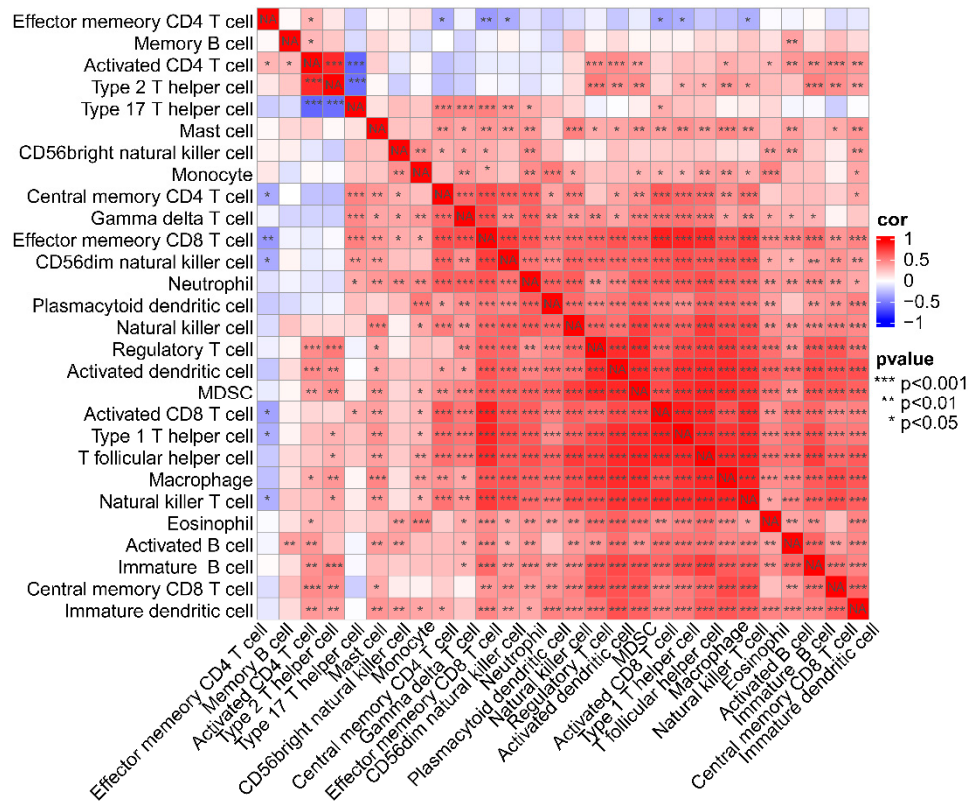

Figure S6. Heatmap of the correlations between immune cells in the GSE111974 dataset.
