# Supplementary material for: Potential Biomarkers and Endometrial Immune Microenvironment in Recurrent Implantation Failure
Source: Biomolecules. 2023 Feb 21;13(3):406. doi: 10.3390/biom13030406 (PMC10046278; doi:10.3390/biom13030406)
Supplement: Supplementary file 1 [file biomolecules-13-00406-s001.zip › Supplementary Table S4-S7.xlsx]

## Sheet: Supplementary Table S4
ID	Description	EnrichmentScore	pvalue
hsa03450	Non-homologous end-joining	-0.606201	0.0369324
hsa03030	DNA replication	-0.593459	0.000561377
hsa03430	Mismatch repair	-0.589892	0.00410831
hsa03060	Protein export	-0.575822	0.00706845
hsa05332	Graft-versus-host disease	-0.560883	0.000751174
hsa05330	Allograft rejection	-0.496471	0.0065445
hsa05144	Malaria	-0.491563	0.00204842
hsa05322	Systemic lupus erythematosus	-0.476745	0.00275786
hsa04610	Complement and coagulation cascades	-0.469791	0.000365631
hsa04340	Hedgehog signaling pathway	-0.453121	0.00701625
hsa04940	Type I diabetes mellitus	-0.444612	0.0157127
hsa04612	Antigen processing and presentation	-0.435535	0.00289593
hsa03050	Proteasome	-0.429766	0.0232126
hsa04110	Cell cycle	-0.412281	0.000361598
hsa05133	Pertussis	-0.406675	0.00762666
hsa05140	Leishmaniasis	-0.394071	0.0128927
hsa04933	AGE-RAGE signaling pathway in diabetic complications	-0.381203	0.00565693
hsa04650	Natural killer cell mediated cytotoxicity	-0.378527	0.00326738
hsa04061	Viral protein interaction with cytokine and cytokine receptor	-0.375468	0.00964864
hsa04613	Neutrophil extracellular trap formation	-0.375095	0.0047532
hsa04062	Chemokine signaling pathway	-0.372253	0.000533713
hsa05418	Fluid shear stress and atherosclerosis	-0.370353	0.00216528
hsa05321	Inflammatory bowel disease	-0.369851	0.0374224
hsa04662	B cell receptor signaling pathway	-0.356933	0.0297673
hsa03040	Spliceosome	-0.356244	0.00596422
hsa04371	Apelin signaling pathway	-0.351673	0.00578348
hsa04658	Th1 and Th2 cell differentiation	-0.348175	0.0296525
hsa04640	Hematopoietic cell lineage	-0.346315	0.0270516
hsa04625	C-type lectin receptor signaling pathway	-0.344266	0.0233406
hsa05323	Rheumatoid arthritis	-0.343028	0.0376324
hsa05164	Influenza A	-0.342899	0.0030368
hsa05150	Staphylococcus aureus infection	-0.341545	0.0383135
hsa04659	Th17 cell differentiation	-0.337903	0.0272146
hsa04145	Phagosome	-0.333398	0.00955127
hsa04660	T cell receptor signaling pathway	-0.333073	0.0398174
hsa04722	Neurotrophin signaling pathway	-0.33155	0.0266546
hsa03010	Ribosome	-0.328246	0.0181622
hsa04218	Cellular senescence	-0.313469	0.0227683
hsa05152	Tuberculosis	-0.309482	0.0189083
hsa05202	Transcriptional misregulation in cancer	-0.296078	0.0401074
hsa04972	Pancreatic secretion	0.330869	0.0316232
hsa00564	Glycerophospholipid metabolism	0.335748	0.0368491
hsa05231	Choline metabolism in cancer	0.336637	0.0249332
hsa00230	Purine metabolism	0.357764	0.00579065
hsa04925	Aldosterone synthesis and secretion	0.36152	0.00840336
hsa04912	GnRH signaling pathway	0.363204	0.00887902
hsa04520	Adherens junction	0.368561	0.0322723
hsa04918	Thyroid hormone synthesis	0.387084	0.0104724
hsa04970	Salivary secretion	0.390372	0.0053357
hsa05412	Arrhythmogenic right ventricular cardiomyopathy	0.406842	0.00355082
hsa04961	Endocrine and other factor-regulated calcium reabsorption	0.407288	0.0204615
hsa01232	Nucleotide metabolism	0.426314	0.00178253
hsa00140	Steroid hormone biosynthesis	0.42699	0.0133304
hsa04911	Insulin secretion	0.427567	0.000666963
hsa00330	Arginine and proline metabolism	0.436789	0.015378
hsa02010	ABC transporters	0.446152	0.0127789
hsa04913	Ovarian steroidogenesis	0.47325	0.0019578
hsa04960	Aldosterone-regulated sodium reabsorption	0.474604	0.0124624
hsa00601	Glycosphingolipid biosynthesis - lacto and neolacto series	0.523641	0.010101
hsa04978	Mineral absorption	0.537921	0.000218962
hsa04964	Proximal tubule bicarbonate reclamation	0.544098	0.0109748
hsa00730	Thiamine metabolism	0.604358	0.0233956
hsa00061	Fatty acid biosynthesis	0.616096	0.00969828

## Sheet: Supplementary Table S5
Gene Symbol
NRCAM
GATA2
MICALCL
ATP13A4
PTK6
TRIB2
FAM110C
SHROOM3
MEGF10
CDC14B
CPT1A
TM7SF2
SLC7A4
PGBD5
SLC39A2
NR4A2
SIDT1
CYP26A1
CHST4
CKMT2
IL20RA
MPZL2
SCGB1D2
SLC16A6
ABCG1
ATP2B2
MAP2K6
CAPN6
FAM155B
FMO5
MCOLN2
ALDH3B2
ST3GAL6
PIWIL2
SOX7
PRKAG2
KIAA1045
SLC46A2
EDA
APOL4
RAB11FIP4
TFPI2
CBLC
TXNDC16
DOK5
ENPP3
CDC14A
ZNF436
SLC43A1
TFCP2L1
FOLR1
DUOX1
RANBP17
SLC39A14
SLC25A29
PDE6A
BIRC3
HOMER2
PHF8
NLRP2
PTGS2
GMPR
SLC4A7
SLC43A3
PEA15
COTL1
GPR68
RGS9BP
SCGB1D4
CERKL
STX19
MFSD6
DUOXA1
TMEM144
NUP153
STEAP4
PROM1
ENTPD8
ZNF750
CPVL
EHF
PDZD8
RAB32
TTC21A
HOXB3

## Sheet: Supplementary Table S6
Gene Symbol
ABCC3
ABLIM3
ACADSB
ACTA2
ADAMTS1
ADAMTS8
ADRA2A
AGR2
ALPL
AMIGO2
ANG
ANK3
ANXA4
AOX1
AQP3
ARG2
ARHGDIB
ARID5B
ASPM
ASS1
ATP1B1
ATP6V0E2
ATP6V1A
BARD1
BCL6
BIRC3
BUB1B
C10orf10
C10orf3
C11orf8
C14orf161
C3
C4.4A
C4BPA
CALB2
CAPN6
CBR3
CCNB2
CD7
CDA
CDC2
CDC20
CENPE
CES1
CFD
CKB
CLDN10
CLDN4
CLU
COBL
COL16A1
COMP
CORO1A
COTL1
CP
CRABP2
CREB3L1
CRISP3
CSRP2
CTNNA2
CTSW
CXCL13
CXCL14
CYBRD1
CYP2J2
CYP3A5
DDX52
DEFB1
DEPDC6
DFNB31
DHRS3
DKK1
DLG7
DPP4
DUOX1
ECM1
EDN3
EDNRB
EFEMP1
EFNA1
EMCN
ENPEP
EPHB3
EVC
FAM59A
FGB
FLJ10719
FLJ20152
FOSL2
FXYD2
G0S2
GABARAPL1
GADD45A
GALNT12
GALNT4
GAS1
GAST
GBP2
GDF15
GLIPR1
GNLY
GPR64
GPRC5C
GPX3
GREM2
GZMA
HABP2
HAL
HAND2
HEY1
HEY2
HLA-DOB
HMHA1
HPGD
HPSE
HRASLS3
HSD11B2
ID4
IDH1
IER3
IGF2
IGFBP1
IL15
IL2RB
IMPA2
INDO
KCNG1
KCNJ2
KCNK7
KHDRBS3
KIAA0802
KIAA0888
KIF11
KIF20A
KIF4A
KLRC1
KMO
KNTC2
KRT7
LAMB3
LEPREL1
LIF
LMCD1
LMOD1
LRFN4
LRP4
LRRC1
LRRC17
MAOA
MAP2K6
MFAP2
MFAP5
MGC11242
MMP26
MRPS2
MSX1
MT1G
MT1H
MT2A
MUC16
MYL9
NDRG2
NKG7
NNMT
NP
NR4A2
NRG2
OFD1
OLFM1
OLFM4
OPRK1
PAEP
PAQR4
PBK
PECI
PENK
PLA1A
POLD4
POSTN
PPARGC1A
PRC1
PRKCQ
PROM1
PROS1
PSMB10
PTGER2
PTPRR
RAD54B
RANBP17
RARRES1
RARRES3
RASSF2
RNASE4
RPRM
RRAS
S100A1
S100A4
S100P
SCGB2A2
SCYE1
SERPINA5
SERPING1
SFRP4
SLC15A1
SLC15A2
SLC16A6
SLC1A1
SLC38A1
SLC7A1
SLPI
SNX10
SOD2
SORD
SOX17
SPDEF
SPP1
STAR
STEAP4
SYNE2
TACC3
TAGLN
TBC1D2
TCN1
TH
THBD
THBS2
TIMP3
TMEM16A
TMEPAI
TMSL8
TOP2A
TRA@
TRH
TSPAN8
TTC21B
VCAM1
XCL1
XCL2

## Sheet: Supplementary Table S7
Gene Symbol	logFC (GSE111974)	logFC (GSE92324)	Foldchange (ERA)
NR4A2	1.25797	252.026	-7.05
SLC16A6	1.45128	704.965	-5.61
MAP2K6	1.81882	46.5342	-3.45
CAPN6	2.67569	3266.13	-4.76
DUOX1	2.16319	1591.84	-6.61
RANBP17	1.07329	87.4336	-5.5
BIRC3	1.5541	1334.07	-3.58
COTL1	-1.02156	-161.747	3.58
STEAP4	1.7564	300.87	-3.04
PROM1	-1.0841	-1785.87	3.65
